# Supplementary material for: Interface-rich mixed P2 + T phase NaxCo0.1Mn0.9O2 (0.44 ≤ x ≤ 0.7) toward fast and high capacity sodium storage
Source: Royal Society of Chemistry journal article supplement (doi:10.1039/c8ta00206a), 2018-01-01
Supplement: c8ta00206a1.pdf [file c8ta00206a1.pdf]

## Supporting Information

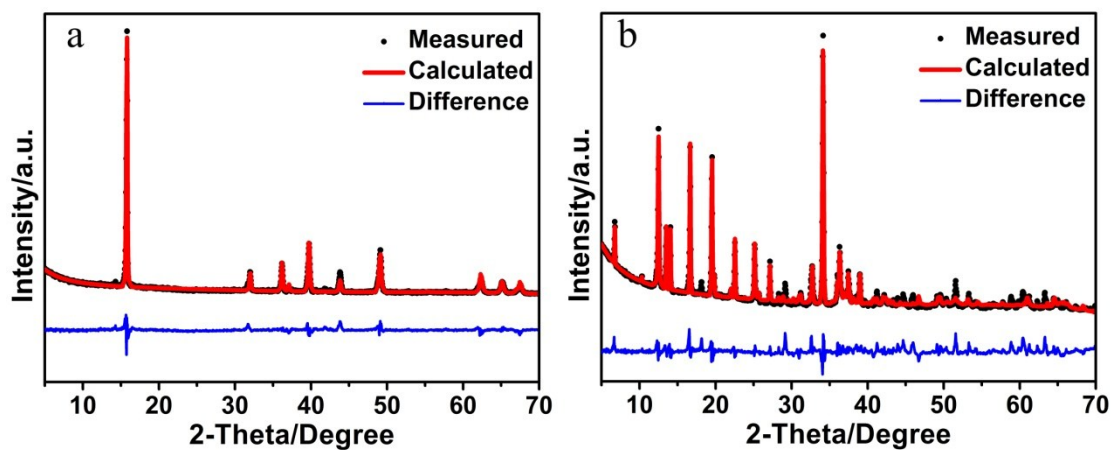

Figure S1 Rietveld refinements of (a) pure P2 -type and (b) T-type material.

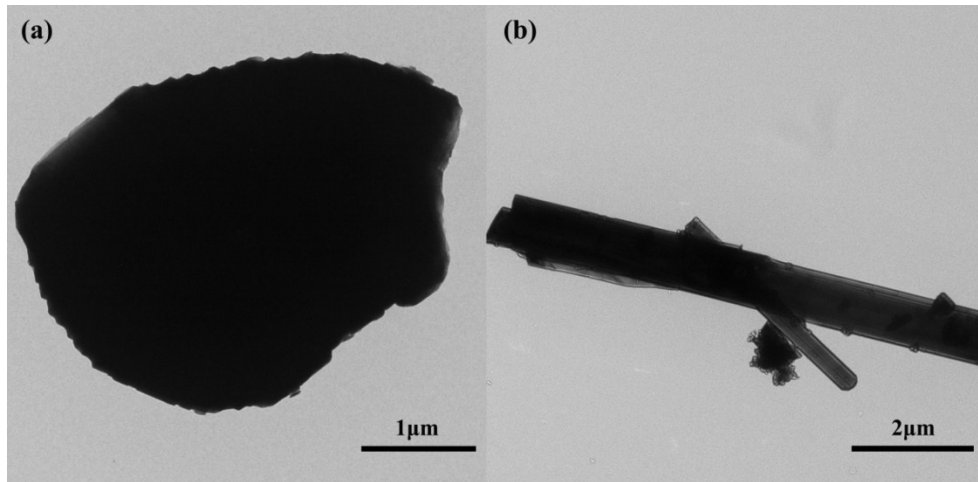

**Figure S2 TEM image of (a) P2 -type and (b) T-type material.**

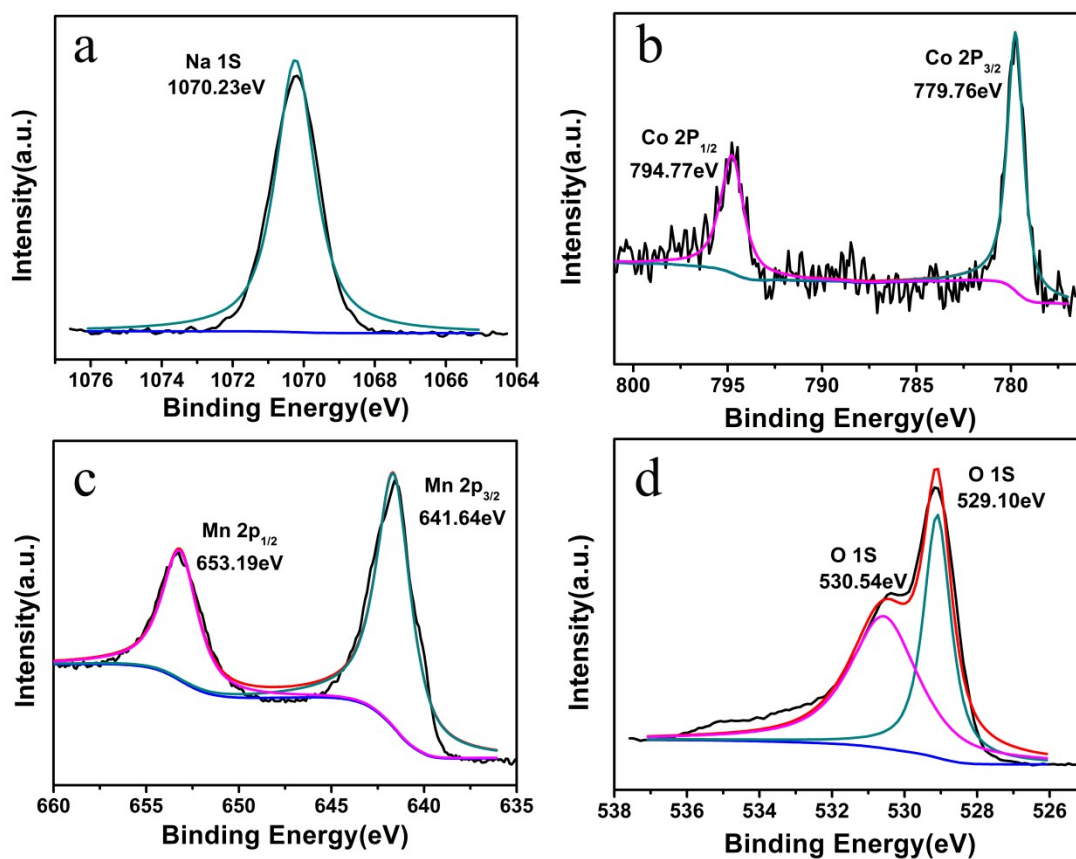

**Figure S3. XPS analysis of the P2+T material: (a) XPS spectrum of Na 1s; (b)Co 2p; (c) Mn 2p; and (d) O 1s.**

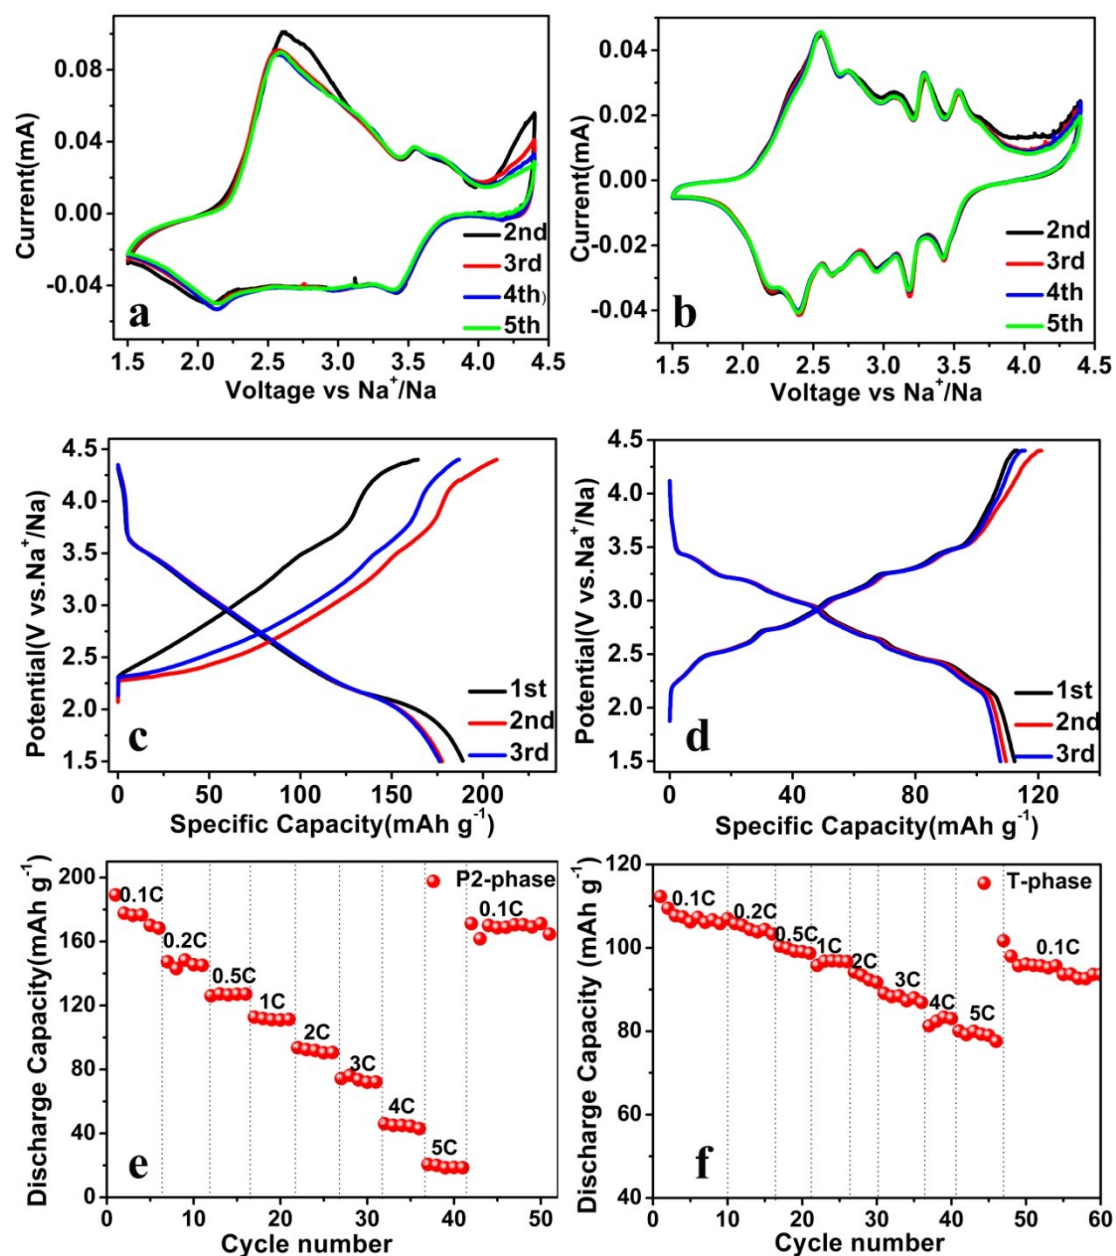

Figure S4.(a-b) Cyclic voltammogram of the P2- and T-phase electrode at a scan rate of 0.1 mVs<sup>-1</sup>; (c-d) Typical charge/discharge voltage profiles of the P2- and T-phase electrode at a current rate of 0.04 C; (e-f) Rate performance of P2- and T-phase, electrode at various current rates.

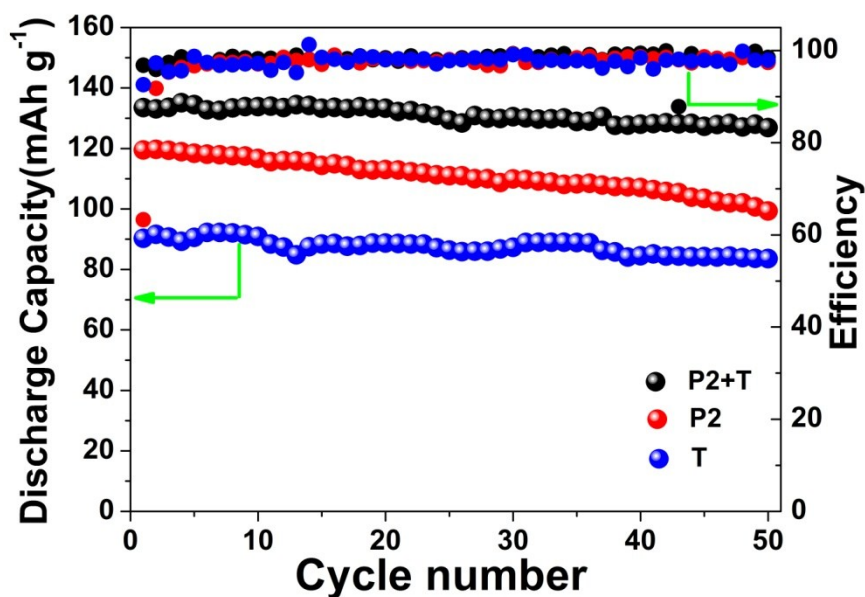

**Figure S5. Specific discharge capacities and coulomb efficiencies versus cycle number for 50 cycles. Potential range: 2–4.4V.**

In a narrow voltage of 2-4.4V, the P2+T phase material exhibits specific discharge capacities of 133.5 mAh g<sup>-1</sup> and 126.9 mAh g<sup>-1</sup> at the 1st and 50th cycle, resulting in 95% capacity retention (2nd–50th cycles). This performance is better than the other two materials. The P2 phase material shows a specific discharge capacity of 99.3 mAh g<sup>-1</sup> after 50th cycles, with a cycle efficiency of 83.1%.

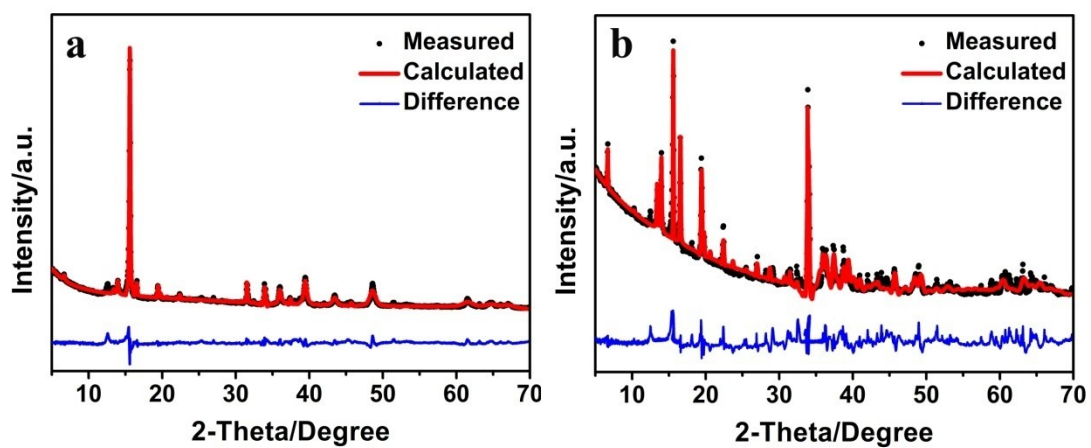

Figure S6 Rietveld refinements of P2+T-type  $\text{Na}_x\text{Co}_{0.1}\text{Mn}_{0.9}\text{O}_2$  with varied P2: T ratio of 50%:50% (a), and 20%:80% (b).

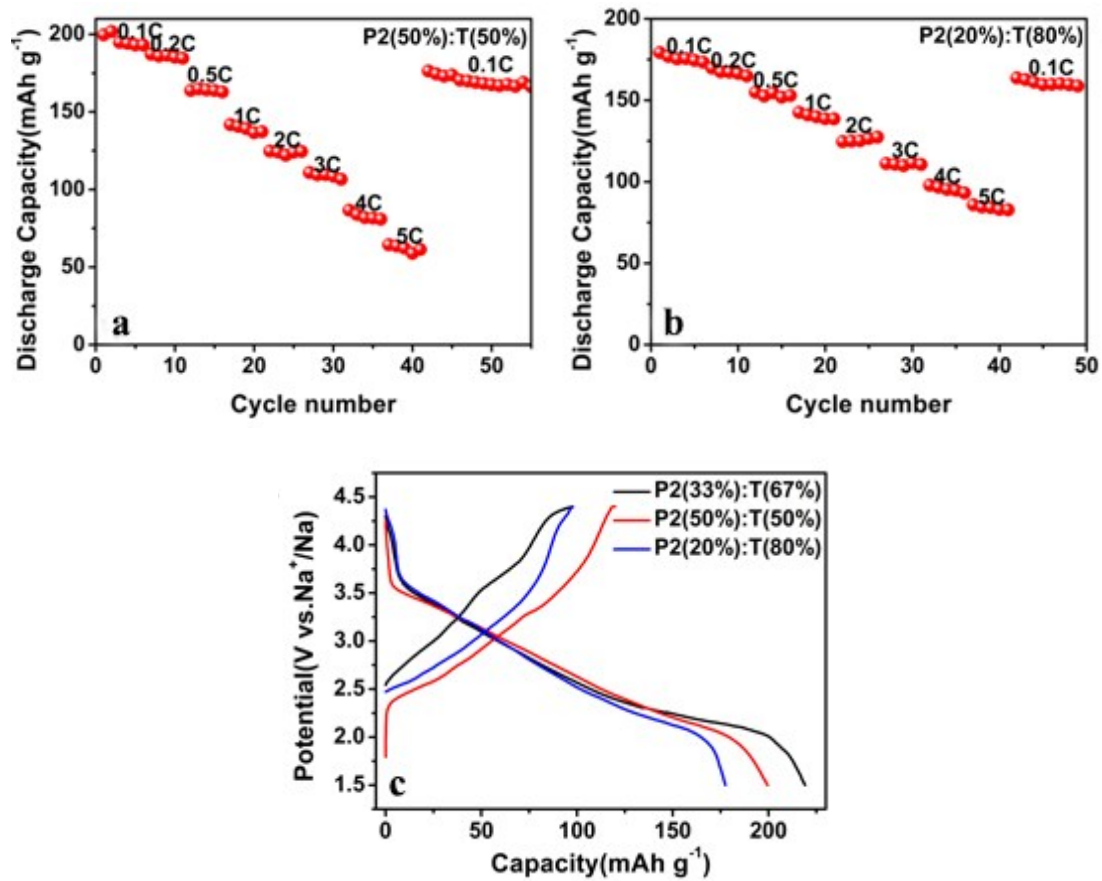

Figure S7 The C-rate performance of  $\text{Na}_x\text{Co}_{0.1}\text{Mn}_{0.9}\text{O}_2$  with the ratio between P2 and T of 50%:50% (a), and 20%:80% (b); (c) Charge/discharge curves of  $\text{Na}_x\text{Co}_{0.1}\text{Mn}_{0.9}\text{O}_2$  with varied P2:T ratio.

**Table S1** Lattice parameters of the P2 compound sample after Rietveld refinement.

| <b>Phase</b>      | <b>P2 (JCPDS: 27-0751)</b> |            |
|-------------------|----------------------------|------------|
| Space Group       | P63/mmc                    |            |
|                   | a (Å)                      | 2.8275     |
|                   | b (Å)                      | 2.8275     |
|                   | c (Å)                      | 11.0295(9) |
|                   | Volume (Å <sup>3</sup> )   | 76.3651    |
| Cell parameters   | $\alpha$ (°)               | 90         |
|                   | $\beta$ (°)                | 90         |
|                   | $\gamma$ (°)               | 120        |
| Agreement factors | Rwp (%)                    | 6.88       |
|                   | Rp (%)                     | 8.56       |



**Table S2** Lattice parameters of the T compound sample after Rietveld refinement.

| <b>Phase</b>      | T (JCPDS: 27-0751)       |            |
|-------------------|--------------------------|------------|
| Space Group       | Pbam                     |            |
|                   | a (Å)                    | 9.1133(9)  |
|                   | b (Å)                    | 21.3177(3) |
|                   | c (Å)                    | 2.8897(9)  |
|                   | Volume (Å <sup>3</sup> ) | 693.0517   |
| Cell parameters   | $\alpha$ (°)             | 90         |
|                   | $\beta$ (°)              | 90         |
|                   | $\gamma$ (°)             | 90         |
| Agreement factors | Rwp (%)                  | 5.97       |
|                   | Rp (%)                   | 9.8        |

**Table S3** Lattice parameters of the P2+T compound sample after Rietveld refinement.

| Phase             | P2 (JCPDS: 27-0751)      |            | T (JCPDS: 27-0750)       |             |
|-------------------|--------------------------|------------|--------------------------|-------------|
| Phase ratio       | 32.39%                   |            | 63.61%                   |             |
| space group       | P63/mmc                  |            | Pbam                     |             |
|                   | a (Å)                    | 2.8791(1)  | a (Å)                    | 9.1125(1)   |
|                   | b (Å)                    | 2.8791(1)  | b (Å)                    | 26.4026(8)  |
|                   | c (Å)                    | 11.3380(5) | c (Å)                    | 2.8235(1)   |
|                   | Volume (Å <sup>3</sup> ) | 81.396(4)  | Volume (Å <sup>3</sup> ) | 679.4678(5) |
| Cell parameters   | $\alpha$ (°)             | 90         | $\alpha$ (°)             | 90          |
|                   | $\beta$ (°)              | 90         | $\beta$ (°)              | 90          |
|                   | $\gamma$ (°)             | 120        | $\gamma$ (°)             | 90          |
| Agreement factors | Rwp(%)                   | 5.49       | Rwp(%)                   | 5.49        |
|                   | Rp(%)                    | 7.69       | Rp(%)                    | 7.69        |

**Table S4** ICP-AES results of the P2+T compound sample

| <b>Theoretical chemical formula</b>                                | <b>Measured atomic ratio</b> |      |      |
|--------------------------------------------------------------------|------------------------------|------|------|
|                                                                    | Na                           | Mn   | Co   |
| <b>Na<sub>x</sub>Mn<sub>0.9</sub>Co<sub>0.1</sub>O<sub>2</sub></b> | 0.48                         | 0.89 | 0.09 |

**Table S5** Electrochemical performance comparison between the previously reported  $\text{Na}_x\text{Mn}_y\text{M}_{1-y}\text{O}_2$  cathodes and P2+T-type  $\text{Na}_x\text{Co}_{0.1}\text{Mn}_{0.9}\text{O}_2$  composite cathode

| Cathode materials                                                 | Rate capability                         | Cycling stability              | First discharge capacity    | Ref.        |
|-------------------------------------------------------------------|-----------------------------------------|--------------------------------|-----------------------------|-------------|
| P2-Type                                                           | 80 mAh g <sup>-1</sup>                  | ~120 mAh g <sup>-1</sup> after | 180 mAh g <sup>-1</sup> (12 | 21          |
| $\text{Na}_{0.78}\text{Ni}_{0.23}\text{Mn}_{0.69}\text{O}_2$      | (605 mA g <sup>-1</sup> )               | 20 cycles                      | mA g <sup>-1</sup> )        |             |
|                                                                   |                                         | (12 mA g <sup>-1</sup> )       |                             |             |
| $\text{Na}_{0.67}\text{Mn}_{0.67}\text{Ni}_{0.33}\text{O}_2$      | 35 mAh g <sup>-1</sup>                  | ~120 mAh g <sup>-1</sup>       | 150 mAh g <sup>-1</sup> (17 | 23          |
|                                                                   | (340 mA g <sup>-1</sup> )               | after 100 cycles               | (17 mA g <sup>-1</sup> )    |             |
|                                                                   |                                         | (17 mA g <sup>-1</sup> )       |                             |             |
| P2-type                                                           | 58 mAh g <sup>-1</sup>                  | ~150 mAh g <sup>-1</sup> after | 190 mAh g <sup>-1</sup> (13 | 25          |
| $\text{Na}_x\text{Fe}_{1/2}\text{Mn}_{1/2}\text{O}_2$             | (1040 mA g <sup>-1</sup> )              | 30 cycles                      | mA g <sup>-1</sup> )        |             |
|                                                                   |                                         | (13 mA g <sup>-1</sup> )       |                             |             |
| P2/O3 composite                                                   | 69 mAh g <sup>-1</sup>                  | ~125 mAh g <sup>-1</sup>       | 200 mAh g <sup>-1</sup> (10 | 26          |
| $\text{Na}_{0.66}\text{Li}_{0.18}\text{Mn}_{0.71}\text{Ni}_{0.2}$ | (500 mA g <sup>-1</sup> )               | after 150 cycles               | mA g <sup>-1</sup> )        |             |
| $\text{Co}_{0.08}\text{O}_{2+}$                                   |                                         | (50 mA g <sup>-1</sup> )       |                             |             |
| P2/O3                                                             | Na <sub>1-</sub> 78 mAh g <sup>-1</sup> | ~134 mAh g <sup>-1</sup>       | 140 mAh g <sup>-1</sup> (15 | 27          |
| $\text{Li}_x\text{Ni}_{0.5}\text{Mn}_{0.5}\text{O}_{2+d}$         | (150 mA g <sup>-1</sup> )               | after 20 cycles                | mA g <sup>-1</sup> )        |             |
|                                                                   |                                         | (15 mA g <sup>-1</sup> )       |                             |             |
| P2/O3                                                             | 110 mAh g <sup>-1</sup>                 | ~130 mAh g <sup>-1</sup>       | 154 mAh g <sup>-1</sup> (18 | 30          |
| $\text{Na}_x\text{Mn}_y\text{Ni}_z\text{Fe}_{0.1}\text{Mg}_{0.1}$ | (900 mA g <sup>-1</sup> )               | after 50 cycles                | mA g <sup>-1</sup> )        |             |
| $\text{O}_2$                                                      |                                         | (180 mA g <sup>-1</sup> )      |                             |             |
| P2- $\text{Na}_x\text{Co}_y\text{Mn}_{1-y}\text{O}_2$ (y          | 120 mAh g <sup>-1</sup>                 | ~117 mAh g <sup>-1</sup>       | 188 mAh g <sup>-1</sup> (20 | 39          |
| = 0, 0.1)                                                         | (400 mA g <sup>-1</sup> )               | after 150 cycles               | mA g <sup>-1</sup> )        |             |
|                                                                   |                                         | (50 mA g <sup>-1</sup> )       |                             |             |
| P2+T                                                              | 117 mAh g <sup>-1</sup>                 | ~145 mAh g <sup>-1</sup>       | 219 mAh g <sup>-1</sup> (18 | <b>This</b> |
| $\text{Na}_x\text{Mn}_{0.9}\text{Co}_{0.1}\text{O}_2$             | (900 mA g <sup>-1</sup> )               | after 50 cycles                | mA g <sup>-1</sup> )        | <b>work</b> |
|                                                                   |                                         | (180 mA g <sup>-1</sup> )      |                             |             |

**Table S6** Na<sup>+</sup> Diffusion Coefficient(D) of P2, T and P2+T materials Calculated from the CV and EIS.

|           |                            | P2      | T       | P2+T    |
|-----------|----------------------------|---------|---------|---------|
| D for CV  | Average slope              | 0.00568 | 0.01436 | 0.01671 |
|           | $D(\times 10^{-12}cm^2/s)$ | 2.156   | 76.55   | 434.24  |
| D for EIS | Slope                      | 13.07   | 32.83   | 8.23    |
|           | $D(\times 10^{-12}cm^2/s)$ | 1.827   | 41.67   | 127.07  |
